# Supplementary material for: Remote sensing inversion and spatial variation of land surface temperature over mining areas of Jixi, Heilongjiang, China
Source: PeerJ. 2020 Nov 25;8:e10257. doi: 10.7717/peerj.10257 (PMC7698694; doi:10.7717/peerj.10257)
Supplement: Supplemental Information 1 [file peerj-08-10257-s001.xlsx]

## Sheet: Sheet1
Chengshan								Didao
	ROI#1	ROI#2	ROI#3	ROI#4	ROI#5	ROI#6			ROI#1	ROI#2	ROI#3	ROI#4	ROI#5	ROI#6
0	93510900	3627000	80803800	30216600	769500	472500		0	7722000	4165200	82365300	126281700	1507500	7200
1	32400	1623600	80451000	30141900	787500	274500		1	4927500	3021300	82312200	126006300	1494900	104400
2	15300	387900	80023500	29872800	827100	153000		2	4865400	1798200	2409300	121896900	836100	118800
3	4500	278100	79387200	28841400	68400	63000		3	2028600	140400	1593900	121712400	798300	900
4	0	25200	78761700	21310200	12600	0
