# Supplementary material for: Remote sensing inversion and spatial variation of land surface temperature over mining areas of Jixi, Heilongjiang, China
Source: PeerJ. 2020 Nov 25;8:e10257. doi: 10.7717/peerj.10257 (PMC7698694; doi:10.7717/peerj.10257)
Supplement: Supplemental Information 2 [file peerj-08-10257-s002.xlsx]

## Sheet: Sheet1
Didao District					Chengshan District
	MIN	MAX	MEAN			MIN	MAX	MEAN
0	18.7683	33.1037	22.4955		0	16.2935	34.3245	23.241
1	18.9463	34.515	22.6849		1	18.9262	35.2581	23.7086
2	19.2657	38.0832	22.9145		2	18.0722	32.3505	23.7198
3	19.5333	34.5308	23.9121		3	18.0751	32.2321	24.8165
					4	21.9044	29.3681	25.7473
