# Supplementary material for: Remote sensing inversion and spatial variation of land surface temperature over mining areas of Jixi, Heilongjiang, China
Source: PeerJ. 2020 Nov 25;8:e10257. doi: 10.7717/peerj.10257 (PMC7698694; doi:10.7717/peerj.10257)
Supplement: Supplemental Information 3 [file peerj-08-10257-s003.xlsx]

## Sheet: Sheet1
Reclass-2015							Reclass-2019
	Temperature grade	Normalized temperature index	Count	Area	Percentage			Temperature grade	Normalized temperature index	Count	Area	Percentage
1	Low temperature zone	0.0-0.2	157191	141471900	0.170888		1	Low temperature zone	0.0-0.2	177577	159819300	0.193051
2	Low-middle temperature zone	0.2-0.4	664206	597785400	0.722083		2	Low-middle temperature zone	0.2-0.4	664267	597840300	0.722149
3	Middle temperature zone	0.4-0.6	90294	81264600	0.098162		3	Middle temperature zone	0.4-0.6	71668	64501200	0.077913
4	Middle-high temperature zone	0.6-0.8	7818	7036200	0.00849924		4	Middle-high temperature zone	0.6-0.8	6042	5437800	0.00656848
5	High temperature zone	0.8-1.0	338	304200	0.000367452		5	High temperature zone	0.8-1.0	293	263700	0.000318531
Total		0.0-1.0	919847	827862300	1		Total		0.0-1.0	919847	827862300	1
