# Supplementary material for: Remote sensing inversion and spatial variation of land surface temperature over mining areas of Jixi, Heilongjiang, China
Source: PeerJ. 2020 Nov 25;8:e10257. doi: 10.7717/peerj.10257 (PMC7698694; doi:10.7717/peerj.10257)
Supplement: Supplemental Information 4 [file peerj-08-10257-s004.xlsx]

## Sheet: Sheet1
LST	Vegetation coverage			Every 25 pixels points on the profile were assigned to a group
21.5823	0.752744
21.7024	0.917108
20.6028	0.908124
20.5614	0.977888
21.3883	0.845768
20.5601	0.882912
20.9248	0.870244
22.3728	0.812628
21.9909	0.719964
24.1308	0.618488
23.0519	0.58012
22.3672	0.432608
21.8491	0.423124
21.9205	0.45644
21.8597	0.722964
20.4786	0.46882
20.4477	0.504408
20.6715	0.865836
21.9298	0.795852
23.3908	0.725924
28.0111	0.305808
22.8249	0.771432
26.6858	0.45458
30.5022	0.06776
22.6252	0.669704
22.4906	0.481004
24.4109	0.415076
23.3528	0.404708
23.9196	0.525576
25.9121	0.159604
22.8034	0.401312
23.5248	0.355832
23.905	0.409216
20.5747	0.849172
20.016	0.878388
21.3338	0.932804
21.9654	0.866632
20.9905	0.80124
20.8396	0.913844
20.3848	0.830316
21.8851	0.878024
20.8712	0.862004
21.556	0.81598
24.1397	0.512596
25.2281	0.586708
24.2181	0.599152
24.4636	0.332164
25.9155	0.527584
30.1105	0.099204
25.0235	0.43262
22.3571	0.635816
22.404	0.5751
24.7627	0.323628
25.5952	0.213128
24.1124	0.221176
24.1391	0.593872
