# Supplementary material for: Remote sensing inversion and spatial variation of land surface temperature over mining areas of Jixi, Heilongjiang, China
Source: PeerJ. 2020 Nov 25;8:e10257. doi: 10.7717/peerj.10257 (PMC7698694; doi:10.7717/peerj.10257)
Supplement: Supplemental Information 5 [file peerj-08-10257-s005.xlsx]

## Sheet: Sheet1
Average Area	number of patches	MIN	MAX	MEAN
900	27	23.48	30.9825	26.8799
1800	24	20.5029	32.3021	27.3784
2700	11	24.8285	30.8683	27.247
3600	12	22.992	30.4922	26.4979
4500	13	25.3643	31.3856	27.9657
5400	10	24.5301	30.1588	28.2333
6300	10	24.8458	31.6143	27.4582
7200	5	24.2664	30.8737	27.263
8100	6	20.9057	29.5437	26.5158
9000	6	23.7435	29.6268	27.5701
9900	6	25.8325	30.6313	28.3947
10800	7	25.163	31.9843	28.2306
12600	5	25.8899	33.0235	28.2576
13500	2	26.3658	30.5825	29.4414
14400	4	23.7053	29.1089	26.9932
15300	1	23.6998	26.6297	25.5761
16200	1	25.9624	28.4641	27.5258
17100	5	21.7122	29.3902	26.569
18000	1	27.5389	30.271	29.0948
19800	6	26.3095	35.1108	29.165
20700	1	30.1973	33.4347	31.8466
21600	1	27.4049	30.615	29.5967
23400	1	27.2981	30.2464	29.2881
24300	3	24.9958	31.3977	28.468
25200	1	26.5732	30.506	29.0153
26100	1	25.306	29.303	27.887
27000	1	26.6241	29.4259	28.2609
28800	3	25.3824	31.2541	28.589
31500	2	24.3907	30.1917	27.545
32400	1	23.9101	31.9222	28.3322
36000	1	26.7941	30.2621	28.4836
39600	2	25.9033	30.5332	28.5364
40500	2	24.7164	30.3584	27.8629
43200	2	24.5456	30.6559	28.3259
48600	1	27.1907	31.844	29.8484
53100	1	27.9613	31.9546	30.215
58500	1	25.451	29.4838	27.849
61200	1	25.7924	31.7252	29.7889
65700	1	28.2695	34.515	31.9016
82800	1	28.4949	32.0571	30.7872
88200	1	24.8948	31.776	29.6313
110700	1	25.567	30.1752	28.6216
114300	1	27.7049	33.2168	31.3605
135000	1	24.7632	31.0478	28.9353
139500	1	25.3279	31.222	28.7019
162000	1	25.408	32.4929	29.8473
175500	1	26.4311	32.3074	30.143
179100	1	27.0441	32.3478	30.1346
241200	1	25.6675	31.4086	29.0373
490500	1	26.2992	33.1037	31.1467
626400	1	24.5819	35.2581	31.5781
754200	1	23.3389	38.0832	31.5818
