# Supplementary material for: Remote sensing inversion and spatial variation of land surface temperature over mining areas of Jixi, Heilongjiang, China
Source: PeerJ. 2020 Nov 25;8:e10257. doi: 10.7717/peerj.10257 (PMC7698694; doi:10.7717/peerj.10257)
Supplement: Supplemental Information 6 [file peerj-08-10257-s006.xlsx]

## Sheet: Sheet1
	Average temperature in buffer zone
	100m	200m	300m	400m	500m	600m	700m	800m	900m	1000m	1100m	1200m	1300m	1400m	1500m
Average Area	0.35**	0.073	-0.013	-0.025	0.009	0.021	0.025	0.052	0.093	0.089	0.094	0.116	0.1	0.075	0.095
Average Temperature	0.79**	0.41**	0.31*	0.30*	0.33*	0.33*	0.30*	0.28*	0.28*	0.29*	0.29*	0.33*	0.32*	0.29*	0.28*
Maximum Temperature	0.71**	0.39**	0.259	0.253	0.30*	0.28*	0.268	0.28*	0.30*	0.29*	0.28*	0.30*	0.272	0.235	0.255
