# Supplementary material for: Remote sensing inversion and spatial variation of land surface temperature over mining areas of Jixi, Heilongjiang, China
Source: PeerJ. 2020 Nov 25;8:e10257. doi: 10.7717/peerj.10257 (PMC7698694; doi:10.7717/peerj.10257)
Supplement: Supplemental Information 7 [file peerj-08-10257-s007.xlsx]

## Sheet: Sheet1
Average Area	MIN	MAX	MEAN	100	200	300	400	500	600	700	800	900	1000	1100	1200	1300	1400	1500
15300	23.6998	26.6297	25.5761	23.0491	22.4022	22.8876	22.6791	21.8033	21.2557	21.2865	21.6083	21.9399	22.0556	21.901	21.6364	21.8163	21.953	22.019
3600	22.992	30.4922	26.4979	25.4218	24.9928	24.8196	24.77	24.5393	24.2821	23.9905	23.8355	23.7166	23.6299	23.5824	23.5727	23.5971	23.6045	23.559
8100	20.9057	29.5437	26.5158	24.7391	24.023	23.7702	23.3973	23.1312	23.0381	22.987	22.939	22.9858	23.08	23.1348	23.1374	23.2576	23.4401	23.5263
17100	21.7122	29.3902	26.569	24.6104	24.172	24.1547	24.0096	24.0545	24.1153	24.0155	23.8833	23.7546	23.7567	23.8237	23.9678	24.0371	24.0131	23.9341
900	23.48	30.9825	26.8799	25.9559	25.4068	25.1616	24.9822	24.8437	24.6181	24.3622	24.158	23.9383	23.6791	23.5035	23.467	23.4332	23.3618	23.2698
14400	23.7053	29.1089	26.9932	24.693	24.3326	25.0941	25.2788	24.8432	24.5922	24.8323	25.0791	24.8599	24.6588	24.6866	24.7513	24.6659	24.5321	24.3801
2700	24.8285	30.8683	27.247	25.6173	24.3823	23.7719	23.405	23.4071	23.3386	23.333	23.4121	23.4696	23.6157	23.7075	23.7778	23.7598	23.7489	23.7545
7200	24.2664	30.8737	27.263	25.7657	24.9634	24.7109	24.7816	24.6362	24.3139	24.3009	24.2711	23.9776	23.7686	23.7086	23.591	23.3558	23.177	23.2376
1800	20.5029	32.3021	27.3784	26.4401	25.7882	25.3756	25.0897	24.9247	24.7055	24.6958	24.6517	24.6186	24.5335	24.1361	23.7958	23.6258	23.5669	23.5669
6300	24.8458	31.6143	27.4582	25.6642	24.7208	24.4199	24.213	24.2239	24.1283	23.9055	23.7532	23.6876	23.644	23.5359	23.4427	23.503	23.4546	23.3127
16200	25.9624	28.4641	27.5258	24.9703	23.5271	23.8215	24.077	24.4068	24.4864	23.9053	23.3711	23.1258	22.876	22.9465	23.039	22.7516	22.4984	22.5338
31500	24.3907	30.1917	27.545	24.4681	23.3181	23.383	23.2558	23.2398	22.9345	22.9663	23.0823	23.3459	23.5488	23.5725	23.348	23.1414	23.3721	23.4657
9000	23.7435	29.6268	27.5701	25.6036	25.0801	25.1096	24.9561	24.7703	24.4879	24.3085	24.0385	23.8447	23.8148	23.8019	23.6748	23.621	23.8581	23.8722
58500	25.451	29.4838	27.849	24.5884	23.6617	23.8918	24.9837	26.6598	27.3078	27.1092	27.0153	26.6018	26.0505	25.7276	24.8487	24.0139	23.4594	23.2006
40500	24.7164	30.3584	27.8629	25.0728	23.9207	23.7993	23.5948	23.5902	23.5414	23.4521	23.4135	23.2584	23.0974	22.882	23.0756	23.1393	23.1363	23.1924
26100	25.306	29.303	27.887	24.7754	23.6132	22.8868	22.739	22.4215	22.0741	21.7233	21.4959	21.325	21.2524	21.1879	21.2087	21.3409	21.6067	21.9431
4500	25.3643	31.3856	27.9657	26.4111	25.3601	24.9097	24.713	24.6284	24.5105	24.478	24.5077	24.5907	24.5416	24.3381	24.1526	24.0917	23.9688	23.7998
10800	25.163	31.9843	28.2306	26.5935	24.9526	24.3606	24.2227	24.1629	23.9403	23.8611	23.8897	23.8821	23.7581	23.5859	23.4112	23.3353	23.1002	22.9359
5400	24.5301	30.1588	28.2333	26.4306	25.3585	25.2928	25.2477	24.9044	24.6582	24.522	24.4317	24.2277	24.1223	24.111	24.0663	23.9127	23.7898	23.6864
12600	25.8899	33.0235	28.2576	26.6205	25.5105	25.4793	25.684	25.5476	25.1779	25.0174	24.9102	24.5797	24.1522	23.9174	23.8837	23.91	23.9947	23.8879
27000	26.6241	29.4259	28.2609	25.6951	24.5378	24.9456	24.5316	23.9004	24.0791	24.326	24.6892	24.2069	23.6502	23.4758	23.6259	23.9467	24.501	24.6647
43200	24.5456	30.6559	28.3259	24.9421	24.142	24.5897	24.9076	25.1617	24.7105	24.4938	24.6239	24.494	24.6573	24.5599	24.4085	24.6716	24.9299	24.5166
32400	23.9101	31.9222	28.3322	25.5008	23.6282	23.4455	23.8623	24.6819	25.3692	25.661	25.3165	24.8397	24.5416	24.2307	23.8024	23.2527	22.902	22.685
9900	25.8325	30.6313	28.3947	26.4512	25.8518	25.2209	24.645	24.5272	24.2998	24.1116	24.0469	24.0238	23.9004	23.6927	23.633	23.5456	23.4594	23.4248
24300	24.9958	31.3977	28.468	26.2491	25.5938	25.1736	24.7887	24.6637	24.5457	24.3618	24.0509	23.894	23.7688	23.577	23.2638	22.9695	22.8254	23.0797
36000	26.7941	30.2621	28.4836	26.5699	25.6841	26.4637	26.3556	26.1806	25.9436	25.7436	25.266	25.1912	25.3198	24.9826	24.4114	24.2161	24.4503	24.7216
39600	25.9033	30.5332	28.5364	25.779	25.0337	24.7215	24.1179	23.5582	23.6836	23.8616	23.7171	23.6563	23.8732	23.9988	24.2849	24.1957	23.9417	23.9645
28800	25.3824	31.2541	28.589	25.8857	24.8533	25.0722	25.0882	24.8117	24.2478	23.8799	23.6606	23.6308	23.6028	23.56	23.6524	23.7864	23.9691	23.9921
110700	25.567	30.1752	28.6216	25.3453	24.2434	24.133	24.0519	24.6429	25.2911	25.7167	25.3761	24.8844	24.4969	23.7271	23.4223	23.4727	23.5733	23.5445
139500	25.3279	31.222	28.7019	25.1023	23.4561	23.4224	23.9252	23.9967	23.9483	24.085	24.154	24.3361	24.8188	25.1094	24.7823	24.5738	24.5044	24.2154
135000	24.7632	31.0478	28.9353	24.8426	23.385	23.8677	23.7737	23.988	24.2181	24.492	25.1582	25.5272	25.0799	24.7601	25.0896	25.1852	25.0101	24.6475
25200	26.5732	30.506	29.0153	25.6418	23.5369	22.2297	21.4766	21.911	22.136	21.8024	21.387	20.9919	20.9187	20.8804	20.9143	21.1411	21.6055	21.6892
241200	25.6675	31.4086	29.0373	26.3076	24.5421	25.0037	25.2605	24.9381	24.8214	24.8215	24.7214	24.6701	24.2144	23.9524	23.6961	23.3786	23.442	23.2672
18000	27.5389	30.271	29.0948	26.2305	24.2972	23.7092	23.8002	24.0451	24.156	23.8713	23.228	22.8771	23.0079	23.4335	23.6711	23.5623	23.4417	23.3409
19800	26.3095	35.1108	29.165	26.5694	24.7913	24.3348	24.3199	24.4071	24.4371	24.4825	24.385	24.2226	24.0576	23.7872	23.739	23.6665	23.7091	23.9405
23400	27.2981	30.2464	29.2881	26.7931	25.7679	25.2725	24.5951	24.2554	24.3867	24.3561	24.0083	23.7351	23.8475	23.7056	23.4625	23.4081	23.4083	23.3481
13500	26.3658	30.5825	29.4414	27.4094	25.8845	25.1547	24.76	24.4855	24.3833	24.5602	24.4221	24.2056	24.1994	24.1033	23.7798	23.4862	23.3191	23.3701
21600	27.4049	30.615	29.5967	25.8442	23.1872	23.5403	24.3078	24.4585	24.7919	24.8771	24.2576	23.9999	24.0665	24.2096	24.5773	24.7869	24.348	23.0629
88200	24.8948	31.776	29.6313	26.3899	24.6746	23.557	23.4072	23.022	23.0183	23.013	22.8151	22.72	22.8504	23.0744	23.223	23.1596	23.3056	23.3032
61200	25.7924	31.7252	29.7889	26.1236	24.0875	24.1591	23.6816	23.1304	23.0893	22.9374	23.0694	23.1296	23.0701	22.9343	23.0477	23.0654	22.8107	22.8783
162000	25.408	32.4929	29.8473	25.8112	24.0128	24.2834	24.6349	24.8209	24.7892	24.5431	24.5344	24.6388	24.3575	23.7537	23.3846	23.1315	23.2401	23.1546
48600	27.1907	31.844	29.8484	27.0823	25.5164	24.9943	24.826	25.0913	24.8944	24.7963	24.5317	24.0352	24.0263	24.1741	24.0371	23.4396	23.4622	23.8751
179100	27.0441	32.3478	30.1346	27.0593	25.2191	25.0914	25.42	25.826	25.3765	24.8545	25.0989	25.5629	25.881	25.7216	25.5125	25.5065	25.0936	24.9029
175500	26.4311	32.3074	30.143	27.4338	25.8531	25.5674	25.6605	25.5777	25.6127	25.6265	25.5878	25.6765	25.9413	25.8983	25.6688	25.2266	25.0489	24.9339
53100	27.9613	31.9546	30.215	27.4356	26.4032	26.0963	25.42	24.9549	24.5815	24.4039	24.1944	23.8633	23.9707	24.2154	23.9918	23.9129	23.9866	23.6547
82800	28.4949	32.0571	30.7872	26.6026	25.3068	24.9543	24.701	24.6781	24.5291	24.1971	24.0026	23.9364	23.7878	23.8918	23.7026	23.4959	23.5287	23.56
490500	26.2992	33.1037	31.1467	27.7116	26.5553	25.4766	24.7378	24.3056	24.0316	23.9972	23.7756	23.3992	23.034	22.6597	22.9476	23.2627	23.3782	23.7434
114300	27.7049	33.2168	31.3605	28.467	26.5378	26.5618	26.9352	26.7265	26.2149	25.5733	25.2631	25.2868	24.8463	24.6227	24.9017	24.9442	24.8391	24.5396
626400	24.5819	35.2581	31.5781	27.4102	25.3916	24.7251	24.4372	24.4825	24.3877	24.1041	23.9265	24.0946	24.1332	24.1855	24.3696	24.1753	23.8714	23.7244
754200	23.3389	38.0832	31.5818	27.0415	23.8563	23.4025	23.3037	23.5792	23.6338	23.6939	23.8736	23.8572	23.854	23.9669	23.731	23.4737	23.3279	23.3498
20700	30.1973	33.4347	31.8466	27.2914	25.0082	24.7174	24.7307	25.0527	24.8645	24.7691	25.5409	25.7353	25.8706	25.6822	25.589	25.56	25.2024	24.9679
65700	28.2695	34.515	31.9016	27.6783	25.9282	26.4488	26.5681	26.4207	26.1822	26.1373	25.4064	24.8813	24.4951	24.047	23.8517	23.7024	23.6396	23.6576
10315.4			27.0015	25.1537	24.393	24.3446	24.2227	24.0634	23.869	23.7607	23.6987	23.6358	23.5894	23.5416	23.4771	23.4281	23.4293	23.4178
25476.9			28.1963	25.8385	24.755	24.6507	24.6366	24.6946	24.6275	24.5277	24.4352	24.2396	24.0625	23.8668	23.6763	23.5651	23.548	23.5184
69576.9			29.0503	26.0108	24.4349	24.1553	24.068	24.04	24.1169	24.1399	23.9454	23.8044	23.7719	23.7155	23.715	23.6772	23.6598	23.5143
218008			30.7831	27.1653	25.3597	25.1137	25.0044	24.9728	24.7836	24.5872	24.5235	24.469	24.4052	24.2887	24.2104	24.069	23.9561	23.9186

## Sheet: Sheet2
	Average temperature in different scale buffers
Average Temperature	100m	200m	300m	400m	500m	600m	700m	800m	900m	1000m	1100m	1200m	1300m	1400m	1500m
27.0015	25.1537	24.393	24.3446	24.2227	24.0634	23.869	23.7607	23.6987	23.6358	23.5894	23.5416	23.4771	23.4281	23.4293	23.4178
28.1963	25.8385	24.755	24.6507	24.6366	24.6946	24.6275	24.5277	24.4352	24.2396	24.0625	23.8668	23.6763	23.5651	23.548	23.5184
29.0503	26.0108	24.4349	24.1553	24.068	24.04	24.1169	24.1399	23.9454	23.8044	23.7719	23.7155	23.715	23.6772	23.6598	23.5143
30.7831	27.1653	25.3597	25.1137	25.0044	24.9728	24.7836	24.5872	24.5235	24.469	24.4052	24.2887	24.2104	24.069	23.9561	23.9186
