# Supplementary material for: Remote sensing inversion and spatial variation of land surface temperature over mining areas of Jixi, Heilongjiang, China
Source: PeerJ. 2020 Nov 25;8:e10257. doi: 10.7717/peerj.10257 (PMC7698694; doi:10.7717/peerj.10257)
Supplement: Supplemental Information 8 [file peerj-08-10257-s008.xlsx]

## Sheet: Sheet1
	count	mean	min	max
chengzihe	199143	25.5327	19.4519	39.13
didao	556812	25.2346	19.1578	42.2885
jiguan	162867	27.1579	21.5761	38.9709
		25.6395	19.1578	42.2885

## Sheet: Sheet2
	area	min	max	%
0-0.2	167366	19.1578	23.7839	0.18195
0.2-0.4	648738	23.7839	28.4101	0.70527
0.4-0.6	95116	28.4101	33.036	0.103404
0.6-0.8	8269	33.0364	37.658	0.00898957
0.8-1.0	355	37.6648	42.2885	0.000385935
	919844			1

## Sheet: Sheet3
	area	mean	min	max		%
Forest land	294.073	23.954	20.7924	30.887		0.355216
Grassland	52.9468	26.5473	21.9423	36.2705		0.0639555
Construction land	109.942	29.1166	20.591	41.7448		0.132801
Cultivated land	357.39	25.7405	21.3517	33.7059		0.431698
Mine land	7.09622	33.3256	24.2743	42.2885		0.00857166
Water area	6.42239	21.7162	19.1578	29.1166		0.00775773
	827.87					1

## Sheet: Sheet4
std	2015	2019
chengzihe	2.4763	2.13584
didao	1.91508	1.62745
jiguan	2.51776	2.23106
1	1.01201	0.972753
2	1.44914	1.43386
3	2.25615	1.96333
4	1.19791	1.09368
5	2.49529	2.31323
6	2.29032	1.73677

## Sheet: Sheet5
	SHENGHE（count）	CHENGSHAN（count）	TOTAL
0-0.2	3413	713	167366		2.03924	0.426012
0.2-0.4	25763	26909	648738		3.97125	4.1479
0.4-0.6	4457	13106	95116		4.68586	13.779
0.6-0.8	1375	1303	8269		16.6284	15.7576
0.8-1.0	191	29	355		53.8028	8.16901
