# Supplementary material for: Remote sensing inversion and spatial variation of land surface temperature over mining areas of Jixi, Heilongjiang, China
Source: PeerJ. 2020 Nov 25;8:e10257. doi: 10.7717/peerj.10257 (PMC7698694; doi:10.7717/peerj.10257)
Supplement: Supplemental Information 9 [file peerj-08-10257-s009.xlsx]

## Sheet: Sheet1
Accuracy evaluation
2015
land use	Forest land	Grassland	Construction land	Cultivated land	Mining land	Water area	Total	Producers Accuracy（%）	Users Accuracy（%）	Kappa Coefficient	Overall Accuracy（%）
Forest land	1646	2	0	0	0	0	1648	99.82	99.88	0.9932	99.5028
Grassland	0	150	0	0	0	0	150	96.15	100
Construction land	3	0	2406	0	0	0	2409	99.22	99.67
Cultivated land	0	4	2	1737	0	0	1743	1000	99.66
Mining land	0	0	17	0	346	0	363	100	95.32
Water area	0	0	0	0	0	319	319	98.46	100
Total	1649	156	2425	1737	346	319	6632	-	-
2019
land use	Forest land	Grassland	Construction land	Cultivated land	Mining land	Water area	Total	Producers Accuracy（%）	Users Accuracy（%）	Kappa Coefficient	Overall Accuracy（%）
Forest land	858	35	0	0	0	0	893	99.77	96.08	0.9361	95.42
Grassland	0	37	34	10	1	0	82	44.58	45.12
Construction land	0	0	1710	35	18	0	1763	96.88	96.07
Cultivated land	2	11	19	821	2	0	855	94.8	95.8
Mining land	0	0	2	0	263	0	265	92.61	99.25
Water area	0	0	0	0	0	231	231	92.4	100
Total	860	83	1765	866	284	231	4089	-	-

## Sheet: Sheet2
Confusion	Matrix:
Overall	Accuracy	=	(3920/4108)	0.954236
Kappa	Coefficient	=	0.9361
	Ground	Truth	(Pixels)
	Class	1	2	3	4	5
	Unclassified	0	0	0	0	0
	ROI	#1	858	35	0	0	0
	ROI	#2	0	37	34	10	1
	ROI	#3	0	0	1710	35	18
	ROI	#4	2	11	19	821	2
	ROI	#5	0	0	2	0	263
	ROI	#6	0	0	0	0	0
	Total		860	83	1765	866	284
	Ground	Truth	(Pixels)
	Class	6	Total
	Unclassified	0	0
	ROI	#1	0	893
	ROI	#2	0	82
	ROI	#3	17	1780
	ROI	#4	2	857
	ROI	#5	0	265
	ROI	#6	231	231
	Total	250	4108
	Ground	Truth	(Percent)
	Class	1	2	3	4	5
	Unclassified	0	0	0	0	0
	ROI	#1	99.77	42.17	0	0	0
	ROI	#2	0	44.58	1.93	1.15	0.35
	ROI	#3	0	0	96.88	4.04	6.34
	ROI	#4	0.23	13.25	1.08	94.8	0.7
	ROI	#5	0	0	0.11	0	92.61
	ROI	#6	0	0	0	0	0
	Total	100	100	100	100	100
	Ground	Truth	(Percent)
	Class	6	Total
	Unclassified	0	0
	ROI	#1	0	21.74
	ROI	#2	0	2
	ROI	#3	6.8	43.33
	ROI	#4	0.8	20.86
	ROI	#5	0	6.45
	ROI	#6	92.4	5.62
	Total	100	100
	Class	Commission	Omission	Commission	Omission
	(Percent)	(Percent)	(Pixels)	(Pixels)
	ROI	#1	3.92	0.23	35/893	2/860
	ROI	#2	54.88	55.42	45/82	46/83
	ROI	#3	3.93	3.12	70/1780	55/1765
	ROI	#4	4.2	5.2	36/857	45/866
	ROI	#5	0.75	7.39	2/265	21/284
	ROI	#6	0	7.6	0/231	19/250
	Class	Prod.	Acc.	User	Acc.	Prod.	Acc.	User	Acc.
	(Percent)	(Percent)	(Pixels)	(Pixels)
	ROI	#1	99.77	96.08	858/860	858/893
	ROI	#2	44.58	45.12	37/83	37/82
	ROI	#3	96.88	96.07	1710/1765	1710/1780
	ROI	#4	94.8	95.8	821/866	821/857
	ROI	#5	92.61	99.25	263/284	263/265
	ROI	#6	92.4	100	231/250	231/231
